# Supplementary material for: Mechanistic study on the photocatalytic degradation of rhodamine B via Mn–Schiff-base-modified Keggin-type polyoxometalate composite materials
Source: Royal Society of Chemistry journal article supplement (doi:10.1039/d4ra08382b), 2025-01-01
Supplement: d4ra08382b1.pdf [file d4ra08382b1.pdf]

ARTICLE

[Supporting Information]

**Mechanistic Study on the Photocatalytic Degradation of Rhodamine B via Mn-Schiff-base-modified Keggin-type polyoxometalate composite materials**

Received 00th January 20xx,  
Accepted 00th January 20xx

DOI: 10.1039/x0xx00000x

Chang Man<sup>a</sup>, Chunpeng Xu<sup>b</sup>, Jinfeng Wang<sup>b</sup>, Xiangli Li<sup>b</sup>, Tong Li<sup>b</sup>, Yanhua Ma<sup>b</sup>, Yongfeng Qiao<sup>\*b</sup>  
and Qiong Wu<sup>\*b</sup>

\* Corresponding authors

a School of Physical Science and Technology, Kunming University, No.2 Pu Xin Road, Economic and Technological Development Zone, Kunming, Yunnan Province, China, 650214

b School of Chemistry and Chemical Engineering, Kunming University, No.2 Pu Xin Road, Economic and Technological Development Zone, Kunming, Yunnan Province, China, 650214

Email: [qiaoyongfengkum@163.com](mailto:qiaoyongfengkum@163.com), [wuqiongkm@163.com](mailto:wuqiongkm@163.com)

---

<sup>a</sup> Address here.

<sup>b</sup> Address here.

<sup>c</sup> Address here.

† Footnotes relating to the title and/or authors should appear here.  
Supplementary Information available: [details of any supplementary information available should be included here]. See DOI: 10.1039/x0xx00000x

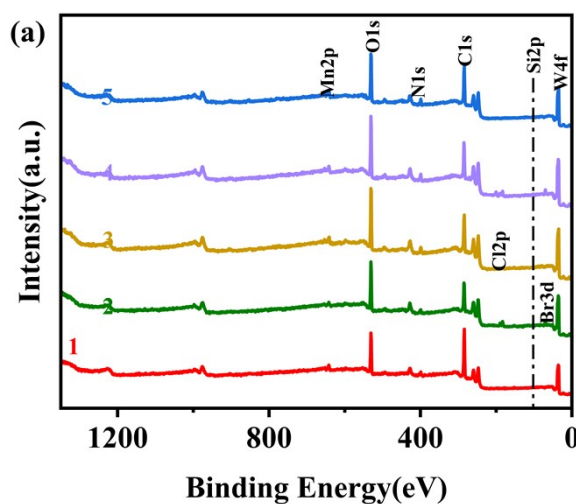

Fig. S1 XPS patterns of compounds 1-5.

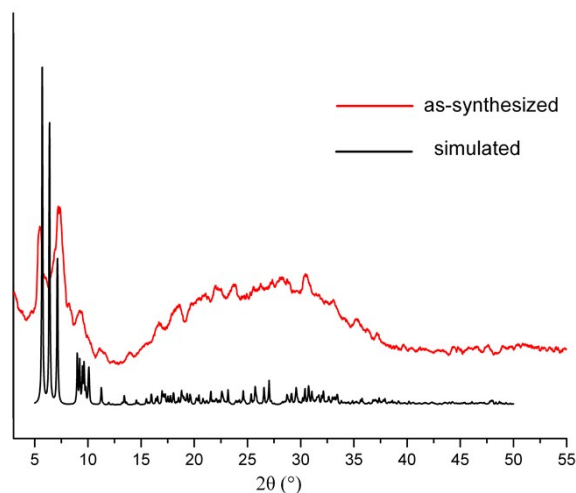Fig. S2 PXRD patterns of compound 1<sup>14</sup>.**Table S1** Mass fractions of C, N, Mn and W for compounds 1-5.

| Compounds | Experimental value/wt % |      |      |       | Calculated value/wt % |      |      |       |              |      |      |       |
|-----------|-------------------------|------|------|-------|-----------------------|------|------|-------|--------------|------|------|-------|
|           |                         |      |      |       | without solvent       |      |      |       | with solvent |      |      |       |
|           | C                       | N    | Mn   | W     | C                     | N    | Mn   | W     | C            | N    | Mn   | W     |
| 1         | 17.53                   | 2.59 | 5.04 | 50.41 | 18.48                 | 2.69 | 5.28 | 53.04 | 17.62        | 2.57 | 5.04 | 50.58 |
| 2         | 14.69                   | 2.16 | 4.22 | 42.29 | 16.05                 | 2.34 | 4.59 | 46.05 | 14.74        | 2.15 | 4.21 | 42.28 |
| 3         | 16.43                   | 2.41 | 4.69 | 47.22 | 17.33                 | 2.53 | 4.96 | 49.75 | 16.52        | 2.41 | 4.73 | 47.43 |
| 4         | 19.15                   | 2.61 | 4.89 | 48.98 | 20.25                 | 2.62 | 5.14 | 51.65 | 19.21        | 2.49 | 4.88 | 49.00 |
| 5         | 28.21                   | 2.11 | 4.16 | 41.45 | 30.40                 | 2.22 | 4.35 | 43.63 | 28.80        | 2.10 | 4.12 | 41.34 |

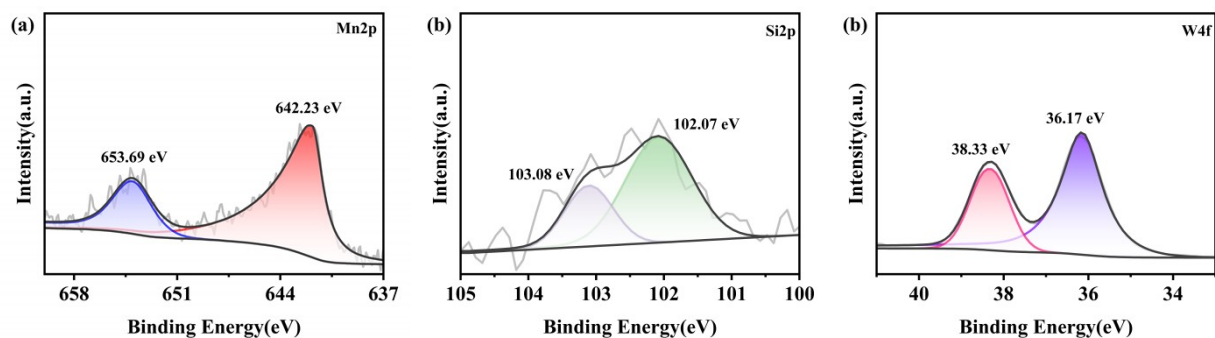

Fig. S3 XPS levels of (a) Mn 2p, (b) Si 2p and (c) W 4f in compound 1.

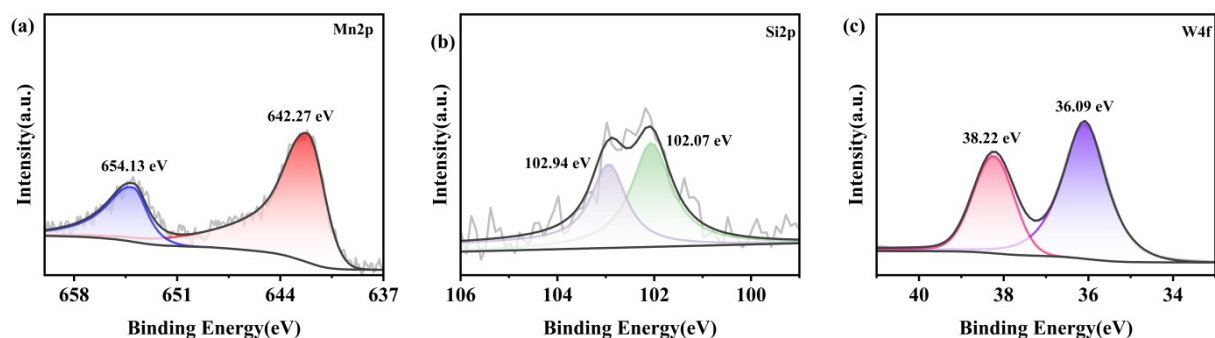

Fig. S4 XPS levels of (a) Mn 2p, (b) Si 2p and (c) W 4f in compound 3.

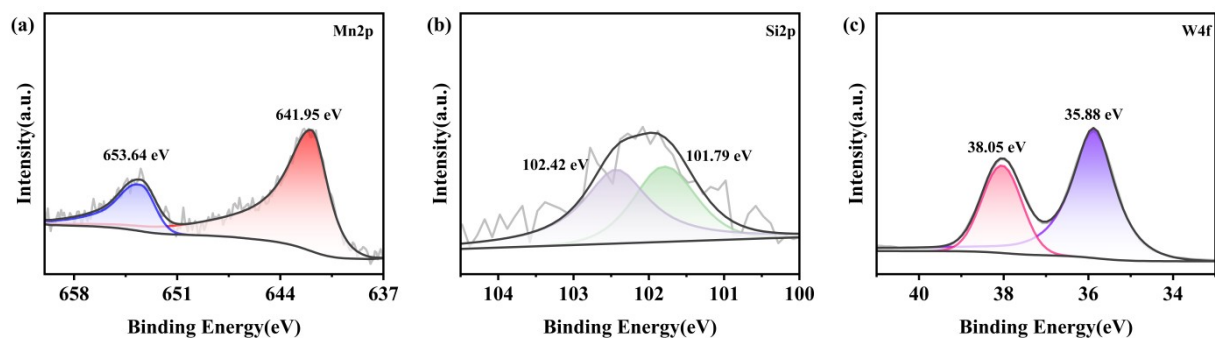

Fig. S5 XPS levels of (a) Mn 2p, (b) Si 2p and (c) W 4f in compound 4.

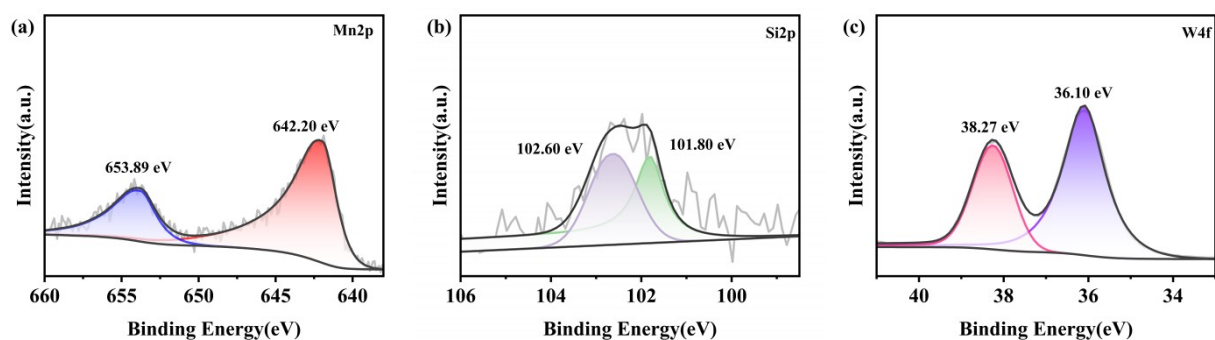

Fig. S6 XPS levels of (a) Mn 2p, (b) Si 2p and (c) W 4f in compound 5.

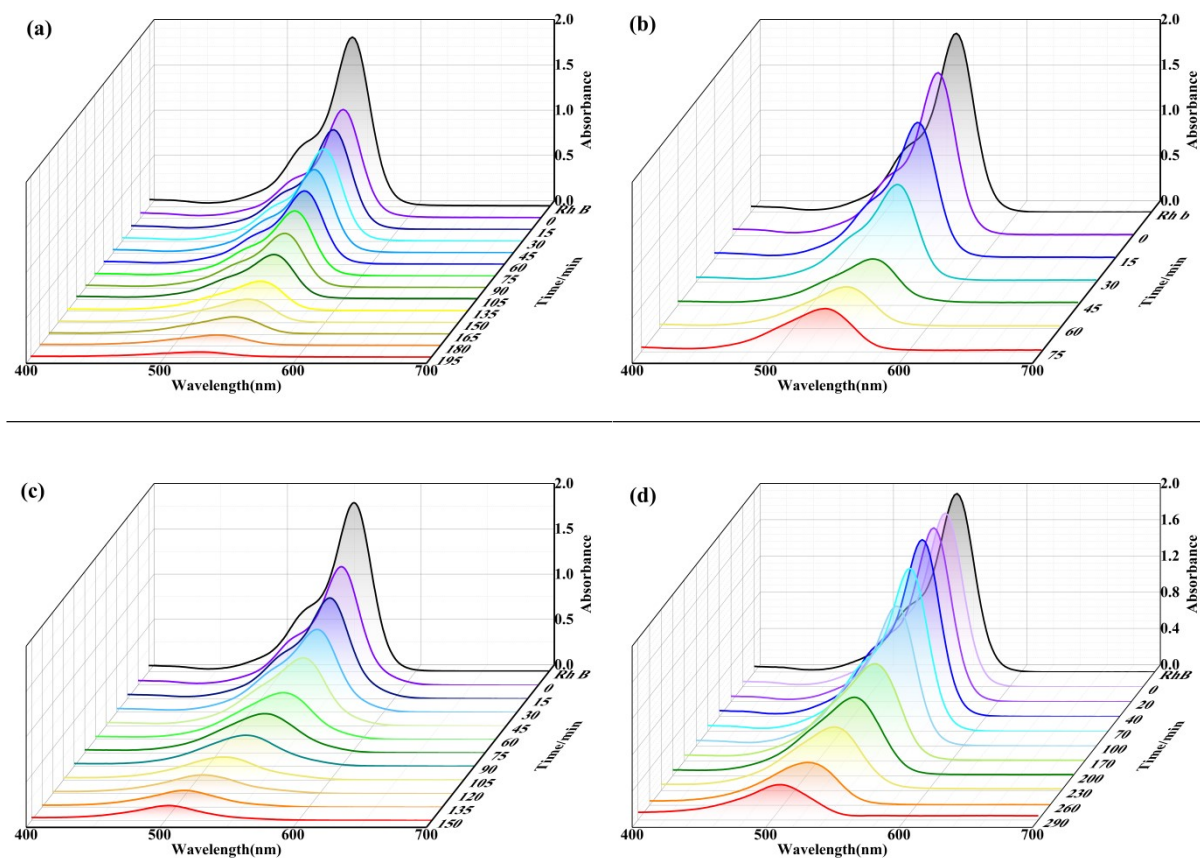

**Fig. S7** Photocatalytic degradation of RhB by (a) compound **1** and (b-d) compounds **3-5**.
